# Supplementary material for: NSD1 Inactivation and SETD2 Mutation Drive a Convergence toward Loss of Function of H3K36 Writers in Clear Cell Renal Cell Carcinomas
Source: Oxford University Press journal article supplement (doi:10.1158/0008-5472.can-17-0143), 2017-07-28
Supplement: 00085472can170143-sup-177525_2_supp_4149316_bsvqpn.docx [file 00085472can170143-sup-177525_2_supp_4149316_bsvqpn.docx]

# *NSD1* inactivation and *SETD2* mutation drive a convergence toward loss-of-function of H3K36 writers in clear-cell renal cell carcinomas

**Su et al.**

**Supplementary information**

**Supplementary Figures and figure legends**


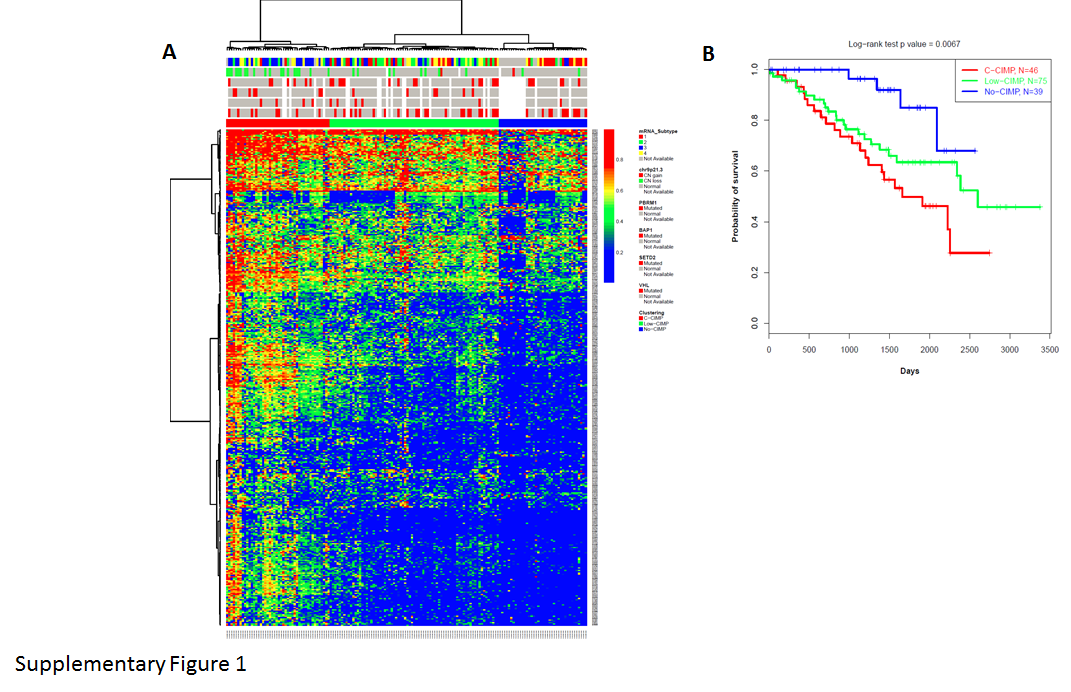


**Supplementary Figure S1. Independent validation of C-CIMP**

A) Supervised clustering of TCGA samples in ccRCC validation dataset assessed by 27k Infinium arrays. The (beta value) level of DNA methylation is represented with a color scale. Each column represents a sample; each row a probe set. The transcriptomic subtype in TCGA, the copy number variation at 9p23.1 locus *(CDKN2A)*, somatic mutation status of four genes (*PBRM1, BAP1, SETD2* and *VHL*) are indicated by red, green and gray squares, with annotations in the legend.

B) Kaplan-Meier curves showing distinct outcome of patients according to the three subgroups of DNA methylation classification, with patients belonging to C-CIMP subgroup having the worst outcome.

**Supplementary Figure S2: Expression vs DNA methylation between C-CIMP and no-CIMP subgroups using volcano and starburst plots.**

A) All CpG loci analyzed for C-CIMP association; x-axis: β-value difference in DNA methylation between C-CIMP and no-CIMP clusters; y-axis: p-value of the corrected FDR between the two groups; red: probes significantly different between the two subgroups.

B) TCGA promoter DNA methylation vs. gene expression analyzed by RNAseq. Log-10 (FDR adjusted p-value) is plotted for DNA methylation (x-axis) and gene expression for each gene (y-axis). Green indicates genes that are downregulated for gene expression and which gain DNA methylation in C-CIMP cluster versus no-CIMP cluster. Red indicates genes that are upregulated for gene expression and gain DNA methylation.

**Supplementary Figure S3: Association between somatic mutations and DNA methylation subgroups.**

A) Mutational load is increased in C-CIMP as compared to no-CIMP and low-CIMP subgroups.

B) Association between somatic mutations of *BAP1* and *SETD2* in C-CIMP subgroup as compared to low-CIMP and no-CIMP subgroups.

**Supplementary Figure S4: Predictive value of VEGF receptor methylation to predict response to sunitinib.** Kaplan-Meier curves for progression-free survival of patients treated with sunitinib according to tumor methylation status of (A) *FLT4*, (B) *FLT1,* and (C) *FLT3* genes in Beuselinck study.

**Supplementary Figure S5: C-CIMP subgroup in metastatic ccRCC**

A)Supervised clustering of DNA methylation in Beuselinck study was consistent with the three DNA methylation subgroups C-CIMP, low-CIMP and no-CIMP.

B) Kaplan-Meier curves for progression-free survival of patients treated with sunitinib according to their CIMP status.

**Supplementary Figure S6: Correlation between methylome signature of NSD1 mutations of patients with Sotos syndrome and ccRCC.**

A)Supervised clustering of DNA methylation in TCGA ccRCC using genome-wide methylome signature of *NSD1* mutations in Sotos syndrome.

B) Kaplan-Meier curves for overall survival of patients with ccRCCs according to *NSD1* mutations in genome-wide methylome signature. Note that the analyzed cohort encompasses 271 ccRCCs assessed by Infinium 450K arrays.
