# Supplementary material for: NSD1 Inactivation and SETD2 Mutation Drive a Convergence toward Loss of Function of H3K36 Writers in Clear Cell Renal Cell Carcinomas
Source: Oxford University Press journal article supplement (doi:10.1158/0008-5472.can-17-0143), 2017-07-28
Supplement: 00085472can170143-sup-177525_2_supp_4149317_qt8sqn.xlsx [file 00085472can170143-sup-177525_2_supp_4149317_qt8sqn.xlsx]

## Sheet: S0
SampleID	Subtype	Clustering
KIRC-3357-01A	CIMPL	cluster1
KIRC-3387-01A	CIMPL	cluster1
KIRC-4622-01A	CIMPL	cluster1
KIRC-4694-01A	CIMPL	cluster1
KIRC-4697-01A	CIMPL	cluster1
KIRC-4699-01A	CIMPL	cluster1
KIRC-4707-01A	CIMPL	cluster1
KIRC-4714-01A	CIMPL	cluster1
KIRC-4810-01A	CIMPL	cluster1
KIRC-4811-01A	CIMPL	cluster1
KIRC-4819-01A	CIMPL	cluster1
KIRC-4827-01A	CIMPL	cluster1
KIRC-4842-01A	CIMPL	cluster1
KIRC-4852-01A	CIMPL	cluster1
KIRC-4864-01A	CIMPL	cluster1
KIRC-4866-01A	CIMPL	cluster1
KIRC-4882-01A	CIMPL	cluster1
KIRC-4902-01A	CIMPL	cluster1
KIRC-4907-01A	CIMPL	cluster1
KIRC-4912-01A	CIMPL	cluster1
KIRC-5010-01A	CIMPL	cluster1
KIRC-5092-01A	CIMPL	cluster1
KIRC-5095-01A	CIMPL	cluster1
KIRC-5098-01A	CIMPL	cluster1
KIRC-5109-01A	CIMPL	cluster1
KIRC-5116-01A	CIMPL	cluster1
KIRC-5180-01A	CIMPL	cluster1
KIRC-5183-01A	CIMPL	cluster1
KIRC-5190-01A	CIMPL	cluster1
KIRC-5191-01A	CIMPL	cluster1
KIRC-5201-01A	CIMPL	cluster1
KIRC-5402-01A	CIMPL	cluster1
KIRC-5452-01A	CIMPL	cluster1
KIRC-5454-01A	CIMPL	cluster1
KIRC-5455-01A	CIMPL	cluster1
KIRC-5462-01A	CIMPL	cluster1
KIRC-5463-01A	CIMPL	cluster1
KIRC-5464-01A	CIMPL	cluster1
KIRC-5549-01A	CIMPL	cluster1
KIRC-5551-01A	CIMPL	cluster1
KIRC-5641-01A	CIMPL	cluster1
KIRC-5676-01A	CIMPL	cluster1
KIRC-5696-01A	CIMPL	cluster1
KIRC-5699-01A	CIMPL	cluster1
KIRC-5701-01A	CIMPL	cluster1
KIRC-5709-01A	CIMPL	cluster1
KIRC-5712-01A	CIMPL	cluster1
KIRC-5838-01A	CIMPL	cluster1
KIRC-5984-01A	CIMPL	cluster1
KIRC-6030-01A	CIMPL	cluster1
KIRC-6031-01A	CIMPL	cluster1
KIRC-6087-01A	CIMPL	cluster1
KIRC-6097-01A	CIMPL	cluster1
KIRC-3358-01A	CIMPN	cluster2
KIRC-3370-01A	CIMPN	cluster2
KIRC-3373-01A	CIMPN	cluster2
KIRC-3376-01A	CIMPN	cluster2
KIRC-3385-01A	CIMPN	cluster2
KIRC-3425-01A	CIMPN	cluster2
KIRC-3431-01A	CIMPN	cluster2
KIRC-3433-01A	CIMPN	cluster2
KIRC-3440-01A	CIMPN	cluster2
KIRC-3450-01A	CIMPN	cluster2
KIRC-3453-01A	CIMPN	cluster2
KIRC-3454-01A	CIMPN	cluster2
KIRC-3458-01A	CIMPN	cluster2
KIRC-3460-01A	CIMPN	cluster2
KIRC-3461-01A	CIMPN	cluster2
KIRC-3924-01A	CIMPN	cluster2
KIRC-4101-01A	CIMPN	cluster2
KIRC-4146-01B	CIMPN	cluster2
KIRC-4177-01A	CIMPN	cluster2
KIRC-4621-01A	CIMPN	cluster2
KIRC-4693-01A	CIMPN	cluster2
KIRC-4706-01A	CIMPN	cluster2
KIRC-4760-01A	CIMPN	cluster2
KIRC-4770-01A	CIMPN	cluster2
KIRC-4782-01A	CIMPN	cluster2
KIRC-4795-01A	CIMPN	cluster2
KIRC-4801-01A	CIMPN	cluster2
KIRC-4816-01A	CIMPN	cluster2
KIRC-4817-01A	CIMPN	cluster2
KIRC-4818-01A	CIMPN	cluster2
KIRC-4823-01A	CIMPN	cluster2
KIRC-4824-01A	CIMPN	cluster2
KIRC-4841-01A	CIMPN	cluster2
KIRC-4843-01A	CIMPN	cluster2
KIRC-4846-01A	CIMPN	cluster2
KIRC-4847-01A	CIMPN	cluster2
KIRC-4849-01A	CIMPN	cluster2
KIRC-4856-01A	CIMPN	cluster2
KIRC-4859-01A	CIMPN	cluster2
KIRC-4863-01A	CIMPN	cluster2
KIRC-4865-01A	CIMPN	cluster2
KIRC-4869-01A	CIMPN	cluster2
KIRC-4897-01A	CIMPN	cluster2
KIRC-4903-01A	CIMPN	cluster2
KIRC-4904-01A	CIMPN	cluster2
KIRC-4905-01A	CIMPN	cluster2
KIRC-4908-01A	CIMPN	cluster2
KIRC-4916-01A	CIMPN	cluster2
KIRC-4918-01A	CIMPN	cluster2
KIRC-4945-01A	CIMPN	cluster2
KIRC-4993-01A	CIMPN	cluster2
KIRC-5080-01A	CIMPN	cluster2
KIRC-5083-01A	CIMPN	cluster2
KIRC-5102-01A	CIMPN	cluster2
KIRC-5104-01A	CIMPN	cluster2
KIRC-5106-01A	CIMPN	cluster2
KIRC-5108-01A	CIMPN	cluster2
KIRC-5110-01A	CIMPN	cluster2
KIRC-5113-01A	CIMPN	cluster2
KIRC-5115-01A	CIMPN	cluster2
KIRC-5117-01A	CIMPN	cluster2
KIRC-5119-01A	CIMPN	cluster2
KIRC-5120-01A	CIMPN	cluster2
KIRC-5121-01A	CIMPN	cluster2
KIRC-5159-01A	CIMPN	cluster2
KIRC-5162-01A	CIMPN	cluster2
KIRC-5163-01A	CIMPN	cluster2
KIRC-5164-01A	CIMPN	cluster2
KIRC-5165-01A	CIMPN	cluster2
KIRC-5168-01A	CIMPN	cluster2
KIRC-5170-01A	CIMPN	cluster2
KIRC-5173-01A	CIMPN	cluster2
KIRC-5174-01A	CIMPN	cluster2
KIRC-5175-01A	CIMPN	cluster2
KIRC-5176-01A	CIMPN	cluster2
KIRC-5177-01A	CIMPN	cluster2
KIRC-5181-01A	CIMPN	cluster2
KIRC-5182-01A	CIMPN	cluster2
KIRC-5184-01A	CIMPN	cluster2
KIRC-5186-01A	CIMPN	cluster2
KIRC-5187-01A	CIMPN	cluster2
KIRC-5189-01A	CIMPN	cluster2
KIRC-5192-01A	CIMPN	cluster2
KIRC-5194-01A	CIMPN	cluster2
KIRC-5195-01A	CIMPN	cluster2
KIRC-5196-01A	CIMPN	cluster2
KIRC-5199-01A	CIMPN	cluster2
KIRC-5200-01A	CIMPN	cluster2
KIRC-5202-01A	CIMPN	cluster2
KIRC-5377-01A	CIMPN	cluster2
KIRC-5378-01A	CIMPN	cluster2
KIRC-5399-01A	CIMPN	cluster2
KIRC-5400-01A	CIMPN	cluster2
KIRC-5453-01A	CIMPN	cluster2
KIRC-5458-01A	CIMPN	cluster2
KIRC-5467-01A	CIMPN	cluster2
KIRC-5545-01A	CIMPN	cluster2
KIRC-5546-01A	CIMPN	cluster2
KIRC-5550-01A	CIMPN	cluster2
KIRC-5552-01B	CIMPN	cluster2
KIRC-5553-01A	CIMPN	cluster2
KIRC-5565-01A	CIMPN	cluster2
KIRC-5566-01A	CIMPN	cluster2
KIRC-5567-01A	CIMPN	cluster2
KIRC-5568-01A	CIMPN	cluster2
KIRC-5569-01A	CIMPN	cluster2
KIRC-5573-01A	CIMPN	cluster2
KIRC-5574-01A	CIMPN	cluster2
KIRC-5575-01A	CIMPN	cluster2
KIRC-5576-01A	CIMPN	cluster2
KIRC-5581-01A	CIMPN	cluster2
KIRC-5583-01A	CIMPN	cluster2
KIRC-5585-01A	CIMPN	cluster2
KIRC-5587-01A	CIMPN	cluster2
KIRC-5588-01A	CIMPN	cluster2
KIRC-5589-01A	CIMPN	cluster2
KIRC-5591-01A	CIMPN	cluster2
KIRC-5633-01A	CIMPN	cluster2
KIRC-5635-01A	CIMPN	cluster2
KIRC-5636-01A	CIMPN	cluster2
KIRC-5639-01A	CIMPN	cluster2
KIRC-5672-01A	CIMPN	cluster2
KIRC-5681-01A	CIMPN	cluster2
KIRC-5683-01A	CIMPN	cluster2
KIRC-5684-01A	CIMPN	cluster2
KIRC-5686-01A	CIMPN	cluster2
KIRC-5690-01A	CIMPN	cluster2
KIRC-5691-01A	CIMPN	cluster2
KIRC-5692-01A	CIMPN	cluster2
KIRC-5693-01A	CIMPN	cluster2
KIRC-5694-01A	CIMPN	cluster2
KIRC-5695-01A	CIMPN	cluster2
KIRC-5697-01A	CIMPN	cluster2
KIRC-5700-01A	CIMPN	cluster2
KIRC-5705-01A	CIMPN	cluster2
KIRC-5710-01A	CIMPN	cluster2
KIRC-5711-01A	CIMPN	cluster2
KIRC-5713-01A	CIMPN	cluster2
KIRC-5812-01A	CIMPN	cluster2
KIRC-5834-01A	CIMPN	cluster2
KIRC-5835-01A	CIMPN	cluster2
KIRC-5836-01A	CIMPN	cluster2
KIRC-5843-01A	CIMPN	cluster2
KIRC-5844-01A	CIMPN	cluster2
KIRC-5905-01A	CIMPN	cluster2
KIRC-5906-01A	CIMPN	cluster2
KIRC-5982-01A	CIMPN	cluster2
KIRC-5986-01A	CIMPN	cluster2
KIRC-5988-01A	CIMPN	cluster2
KIRC-5989-01A	CIMPN	cluster2
KIRC-6032-01A	CIMPN	cluster2
KIRC-6088-01A	CIMPN	cluster2
KIRC-6093-01A	CIMPN	cluster2
KIRC-3367-01A	CIMP	cluster3
KIRC-3434-01A	CIMP	cluster3
KIRC-3445-01A	CIMP	cluster3
KIRC-4153-01B	CIMP	cluster3
KIRC-4688-01A	CIMP	cluster3
KIRC-4690-01A	CIMP	cluster3
KIRC-4691-01A	CIMP	cluster3
KIRC-4696-01A	CIMP	cluster3
KIRC-4698-01A	CIMP	cluster3
KIRC-4700-01A	CIMP	cluster3
KIRC-4701-01A	CIMP	cluster3
KIRC-4703-01A	CIMP	cluster3
KIRC-4712-01A	CIMP	cluster3
KIRC-4713-01A	CIMP	cluster3
KIRC-4718-01A	CIMP	cluster3
KIRC-4813-01A	CIMP	cluster3
KIRC-4814-01A	CIMP	cluster3
KIRC-4815-01A	CIMP	cluster3
KIRC-4821-01A	CIMP	cluster3
KIRC-4828-01A	CIMP	cluster3
KIRC-4844-01A	CIMP	cluster3
KIRC-4845-01A	CIMP	cluster3
KIRC-4848-01A	CIMP	cluster3
KIRC-4853-01A	CIMP	cluster3
KIRC-4901-01A	CIMP	cluster3
KIRC-4920-01A	CIMP	cluster3
KIRC-4923-01A	CIMP	cluster3
KIRC-5094-01A	CIMP	cluster3
KIRC-5096-01A	CIMP	cluster3
KIRC-5097-01A	CIMP	cluster3
KIRC-5099-01A	CIMP	cluster3
KIRC-5100-01A	CIMP	cluster3
KIRC-5107-01A	CIMP	cluster3
KIRC-5158-01A	CIMP	cluster3
KIRC-5169-01A	CIMP	cluster3
KIRC-5178-01A	CIMP	cluster3
KIRC-5198-01A	CIMP	cluster3
KIRC-5457-01A	CIMP	cluster3
KIRC-5460-01A	CIMP	cluster3
KIRC-5461-01A	CIMP	cluster3
KIRC-5465-01A	CIMP	cluster3
KIRC-5468-01A	CIMP	cluster3
KIRC-5469-01A	CIMP	cluster3
KIRC-5470-01A	CIMP	cluster3
KIRC-5580-01A	CIMP	cluster3
KIRC-5584-01A	CIMP	cluster3
KIRC-5590-01A	CIMP	cluster3
KIRC-5671-01A	CIMP	cluster3
KIRC-5675-01A	CIMP	cluster3
KIRC-5677-01A	CIMP	cluster3
KIRC-5678-01A	CIMP	cluster3
KIRC-5679-01A	CIMP	cluster3
KIRC-5680-01A	CIMP	cluster3
KIRC-5682-01A	CIMP	cluster3
KIRC-5689-01A	CIMP	cluster3
KIRC-5698-01A	CIMP	cluster3
KIRC-5703-01A	CIMP	cluster3
KIRC-5706-01A	CIMP	cluster3
KIRC-5832-01A	CIMP	cluster3
KIRC-5985-01A	CIMP	cluster3
KIRC-5987-01A	CIMP	cluster3
KIRC-6027-01A	CIMP	cluster3
KIRC-6028-01A	CIMP	cluster3
KIRC-6033-01A	CIMP	cluster3
KIRC-6090-01A	CIMP	cluster3
Supplementary Table 1: List of ccRCCs from TCGA dataset assessed for DNA methylation using Infinium 450K arrays. One column lists the DNA methylation subgroup to which each ccRCC sample belongs (CIMP= C-CIMP; CIMPL= low-CIMP; CIMPN= no-CIMP).
