# Supplementary material for: NSD1 Inactivation and SETD2 Mutation Drive a Convergence toward Loss of Function of H3K36 Writers in Clear Cell Renal Cell Carcinomas
Source: Oxford University Press journal article supplement (doi:10.1158/0008-5472.can-17-0143), 2017-07-28
Supplement: 00085472can170143-sup-177525_2_supp_4149318_ft3ghf.xlsx [file 00085472can170143-sup-177525_2_supp_4149318_ft3ghf.xlsx]

## Sheet: S1
	mRNAlncRNA_Name	Mean beta value cluster2	Mean beta value cluster 3	fold Change	log2FoldChange	diff	pval	padj	cluster2.ExpressionMean	cluste3.ExpressionMean	ExpressionfoldChange	log2ExpressionfoldChange	Expressionpval	Expressionpadj	chr	start	end
cg03502002	GALR1	0.0902614	0.603231	6.68315	2.74053	0.512969	8.36442e-30	2.56458e-25	NA	NA	NA	NA	NA	NA	chr18	74962504	74980858
cg04534765	GALR1	0.0888105	0.491738	5.53694	2.46909	0.402928	1.41469e-29	2.56458e-25	NA	NA	NA	NA	NA	NA	chr18	74962504	74980858
cg07682600	FLT4	0.064183	0.439754	6.85156	2.77643	0.375571	6.11644e-29	3.19312e-25	3706.98	2241.07	0.604554	-0.726056	1.66445e-05	0.00104748	chr5	180028505	180076624
cg06769546	NKX6-2	0.101111	0.454354	4.49361	2.16787	0.353243	6.60528e-29	3.19312e-25	NA	NA	NA	NA	NA	NA	chr10	134598296	134599556
cg09321400	SLC6A2	0.105856	0.473631	4.47428	2.16166	0.367775	4.45878e-29	3.19312e-25	NA	NA	NA	NA	NA	NA	chr16	55689515	55740104
cg24496475	NKX1-1	0.149346	0.532585	3.5661	1.83435	0.383238	4.70327e-29	3.19312e-25	NA	NA	NA	NA	NA	NA	chr4	1396719	1400119
cg09442654	FAM150A	0.170503	0.568754	3.33574	1.73801	0.398251	4.95888e-29	3.19312e-25	NA	NA	NA	NA	NA	NA	chr8	53446596	53478067
cg16399049	HS3ST2	0.150301	0.420877	2.80023	1.48555	0.270576	5.96566e-29	3.19312e-25	222.721	244.227	1.09656	0.132982	0.921966	0.978073	chr16	22825497	22927659
cg15207742	RIMS4	0.104039	0.4522	4.34644	2.11983	0.348161	9.06242e-29	3.46242e-25	NA	NA	NA	NA	NA	NA	chr20	43380448	43438979
cg14045872	VWC2	0.0620196	0.442615	7.1367	2.83526	0.380596	1.56803e-28	5.1683e-25	NA	NA	NA	NA	NA	NA	chr7	49813256	49952138
cg10671668	KCNA6	0.120693	0.4398	3.64396	1.86551	0.319107	1.44021e-28	5.1683e-25	NA	NA	NA	NA	NA	NA	chr12	4918341	4960277
cg25691167	FERD3L	0.100725	0.479954	4.76497	2.25247	0.379228	1.72413e-28	5.43572e-25	NA	NA	NA	NA	NA	NA	chr7	19184404	19185044
cg05933904	SOX8	0.097902	0.531046	5.42426	2.43943	0.433144	2.09665e-28	6.08136e-25	NA	NA	NA	NA	NA	NA	chr16	1031807	1036979
cg17911318	GALR1	0.0732549	0.427508	5.83589	2.54495	0.354253	2.89128e-28	7.06187e-25	NA	NA	NA	NA	NA	NA	chr18	74962504	74980858
cg15790820	ASCL2	0.0816209	0.423554	5.18928	2.37553	0.341933	3.74675e-28	7.99082e-25	30.9547	39.8378	1.28697	0.36398	0.493828	0.810935	chr11	2289724	2292182
cg12180703	SLC32A1	0.100549	0.423108	4.20797	2.07313	0.322559	3.63598e-28	7.99082e-25	NA	NA	NA	NA	NA	NA	chr20	37353104	37358015
cg20443254	ASCL4	0.073366	0.498446	6.79397	2.76425	0.42508	4.11758e-28	8.53081e-25	NA	NA	NA	NA	NA	NA	chr12	108168161	108170421
cg23688510	T	0.123033	0.404231	3.28556	1.71614	0.281198	5.03542e-28	9.88822e-25	NA	NA	NA	NA	NA	NA	chr6	166571143	166582188
cg14638883	T	0.0971307	0.401508	4.13368	2.04743	0.304377	6.19878e-28	1.15254e-24	NA	NA	NA	NA	NA	NA	chr6	166571143	166582188
cg17403609	FLT4	0.0969739	0.474554	4.89363	2.2909	0.37758	6.78124e-28	1.17078e-24	3706.98	2241.07	0.604554	-0.726056	1.66445e-05	0.00104748	chr5	180028505	180076624
cg06360427	GALR1	0.191248	0.521262	2.72557	1.44656	0.330013	9.04037e-28	1.45677e-24	NA	NA	NA	NA	NA	NA	chr18	74962504	74980858
cg07469402	DBX2	0.0996078	0.432231	4.33932	2.11747	0.332623	1.07878e-27	1.56451e-24	NA	NA	NA	NA	NA	NA	chr12	45408454	45444882
cg08832906	CLEC2L	0.0769608	0.468092	6.08222	2.6046	0.391132	1.13442e-27	1.58193e-24	NA	NA	NA	NA	NA	NA	chr7	139208601	139229730
cg17162024	FAM150A	0.115928	0.473815	4.08715	2.03109	0.357887	1.22969e-27	1.6558e-24	NA	NA	NA	NA	NA	NA	chr8	53446596	53478067
cg06808751	OPRK1	0.185876	0.511231	2.75039	1.45964	0.325355	1.23306e-27	1.6558e-24	NA	NA	NA	NA	NA	NA	chr8	54138283	54164257
cg15841063	FOXD3	0.119464	0.478569	4.00597	2.00215	0.359105	1.3455e-27	1.77393e-24	NA	NA	NA	NA	NA	NA	chr1	63788729	63790797
cg09635053	SOX8	0.0386797	0.409985	10.5995	3.40592	0.371305	1.61184e-27	2.05051e-24	NA	NA	NA	NA	NA	NA	chr16	1031807	1036979
cg19619405	ADAMTS20	0.0694706	0.486108	6.99732	2.8068	0.416637	1.93926e-27	2.23026e-24	NA	NA	NA	NA	NA	NA	chr12	43747668	43945724
cg07303244	OPRK1	0.0769281	0.449985	5.84942	2.54829	0.373057	2.09145e-27	2.23026e-24	NA	NA	NA	NA	NA	NA	chr8	54138283	54164257
cg26923490	KCNA7	0.127412	0.4728	3.7108	1.89173	0.345388	1.83505e-27	2.23026e-24	NA	NA	NA	NA	NA	NA	chr19	49570674	49576198
cg07143083	WBSCR17	0.172667	0.480092	2.78046	1.47532	0.307426	2.06211e-27	2.23026e-24	227.187	129.731	0.571034	-0.808351	0.753556	0.927355	chr7	70597154	71178585
cg08441806	NKX6-2	0.185967	0.471446	2.5351	1.34204	0.285479	1.95813e-27	2.23026e-24	NA	NA	NA	NA	NA	NA	chr10	134598296	134599556
cg05627639	CHST8	0.0650523	0.439154	6.75078	2.75505	0.374102	2.29752e-27	2.37457e-24	NA	NA	NA	NA	NA	NA	chr19	34112860	34264413
cg16150752	MARCH11	0.0801765	0.4638	5.78474	2.53225	0.383624	2.54046e-27	2.52351e-24	NA	NA	NA	NA	NA	NA	chr5	16067247	16180871
cg20872937	GALR1	0.0505359	0.4104	8.12095	3.02165	0.359864	2.63722e-27	2.54977e-24	NA	NA	NA	NA	NA	NA	chr18	74962504	74980858
cg16491617	OPRK1	0.0880588	0.483077	5.48584	2.45571	0.395018	2.79414e-27	2.64145e-24	NA	NA	NA	NA	NA	NA	chr8	54138283	54164257
cg03900143	ZIC1	0.155379	0.541492	3.48498	1.80115	0.386113	2.91359e-27	2.64145e-24	NA	NA	NA	NA	NA	NA	chr3	147111208	147228080
cg19870512	KCNA6	0.159124	0.545662	3.42916	1.77785	0.386537	2.9876e-27	2.64195e-24	NA	NA	NA	NA	NA	NA	chr12	4918341	4960277
cg13326227	INSM1	0.0513856	0.418769	8.14954	3.02672	0.367384	3.32336e-27	2.80217e-24	NA	NA	NA	NA	NA	NA	chr20	20348764	20351590
cg13445796	DBX1	0.106902	0.539123	5.04315	2.33433	0.432221	3.74208e-27	3.04887e-24	NA	NA	NA	NA	NA	NA	chr11	20177700	20182159
cg05965392	FAM150A	0.0931307	0.440554	4.73049	2.24199	0.347423	3.88098e-27	3.11692e-24	NA	NA	NA	NA	NA	NA	chr8	53446596	53478067
cg20723355	FBXO39	0.134712	0.506477	3.75969	1.91061	0.371765	4.26874e-27	3.32838e-24	NA	NA	NA	NA	NA	NA	chr17	6679541	6700420
cg20209308	GSC2	0.166961	0.4762	2.85217	1.51206	0.309239	6.10143e-27	4.42433e-24	NA	NA	NA	NA	NA	NA	chr22	19136088	19137796
cg18206027	VWC2	0.0993072	0.449431	4.52566	2.17813	0.350124	6.18791e-27	4.44261e-24	NA	NA	NA	NA	NA	NA	chr7	49813256	49952138
cg06463958	T	0.0747974	0.459523	6.14357	2.61908	0.384726	6.65226e-27	4.52059e-24	NA	NA	NA	NA	NA	NA	chr6	166571143	166582188
cg09053680	UTF1	0.161039	0.582062	3.61441	1.85376	0.421022	6.49347e-27	4.52059e-24	NA	NA	NA	NA	NA	NA	chr10	135043777	135045062
cg04733537	TMEM132D	0.117431	0.405846	3.45603	1.78912	0.288415	6.67057e-27	4.52059e-24	NA	NA	NA	NA	NA	NA	chr12	129556269	130388211
cg11940285	TRH	0.0977712	0.459631	4.70108	2.23299	0.36186	7.45107e-27	4.95687e-24	NA	NA	NA	NA	NA	NA	chr3	129693147	129696781
cg12215340	ADRA1D	0.172765	0.443308	2.56596	1.3595	0.270543	8.60955e-27	5.38193e-24	NA	NA	NA	NA	NA	NA	chr20	4201328	4229721
cg13794993	SALL3	0.181379	0.434231	2.39405	1.25945	0.252852	8.49077e-27	5.38193e-24	NA	NA	NA	NA	NA	NA	chr18	76740274	76762677
cg04996219	CTNND2	0.0775229	0.492138	6.3483	2.66637	0.414616	8.71987e-27	5.40431e-24	NA	NA	NA	NA	NA	NA	chr5	10971951	11904155
cg07676859	SSTR4	0.195647	0.600385	3.06871	1.61763	0.404738	8.94012e-27	5.49386e-24	NA	NA	NA	NA	NA	NA	chr20	23016056	23017314
cg20168230	GRIK3	0.162268	0.489246	3.01505	1.59218	0.326978	9.05541e-27	5.51794e-24	1678.01	883.426	0.526474	-0.925566	2.94912e-06	0.000289793	chr1	37261127	37499730
cg25720804	TLX3	0.15949	0.510369	3.2	1.67807	0.350879	1.00196e-26	5.85931e-24	NA	NA	NA	NA	NA	NA	chr5	170736287	170739138
cg13368756	CTNND2	0.0695229	0.454308	6.53465	2.70811	0.384785	1.0672e-26	6.09337e-24	NA	NA	NA	NA	NA	NA	chr5	10971951	11904155
cg00123055	SOX17	0.182431	0.444062	2.43413	1.28341	0.26163	1.09436e-26	6.15157e-24	332.878	230.33	0.691936	-0.531289	0.101102	0.406313	chr8	55370494	55373448
cg18862481	TRH	0.132569	0.517108	3.90068	1.96373	0.384539	1.22467e-26	6.58996e-24	NA	NA	NA	NA	NA	NA	chr3	129693147	129696781
cg18081940	TDRD10	0.103281	0.452646	4.38266	2.13181	0.349365	1.31902e-26	6.88104e-24	62.9039	61.2802	0.974187	-0.03773	0.97053	0.993369	chr1	154474694	154520623
cg02457680	TDRD10	0.12902	0.442138	3.42691	1.77691	0.313119	1.35472e-26	6.96703e-24	62.9039	61.2802	0.974187	-0.03773	0.97053	0.993369	chr1	154474694	154520623
cg20049415	NKX2-4	0.156209	0.503015	3.22014	1.68712	0.346806	1.5016e-26	7.46921e-24	NA	NA	NA	NA	NA	NA	chr20	21376004	21378666
cg19852958	NKX3-2	0.0784183	0.459877	5.86441	2.55199	0.381459	1.56308e-26	7.60696e-24	NA	NA	NA	NA	NA	NA	chr4	13542453	13546674
cg02467990	VWC2	0.112784	0.548277	4.86129	2.28134	0.435493	1.64073e-26	7.87909e-24	NA	NA	NA	NA	NA	NA	chr7	49813256	49952138
cg03544320	CRMP1	0.191569	0.610246	3.18552	1.67153	0.418678	1.70342e-26	8.07319e-24	1356.21	1183.44	0.872606	-0.196598	0.476539	0.80013	chr4	5749810	5894785
cg07195011	CTNND2	0.0927516	0.579677	6.24978	2.6438	0.486925	1.74054e-26	8.19556e-24	NA	NA	NA	NA	NA	NA	chr5	10971951	11904155
cg26001902	SLC5A7	0.093902	0.4938	5.25868	2.3947	0.399898	1.87321e-26	8.68198e-24	NA	NA	NA	NA	NA	NA	chr2	108602978	108630450
cg07076175	FAM150A	0.158333	0.499723	3.15615	1.65816	0.34139	1.92935e-26	8.85462e-24	NA	NA	NA	NA	NA	NA	chr8	53446596	53478067
cg22534145	SSTR4	0.180392	0.501092	2.77779	1.47394	0.3207	1.95833e-26	8.93111e-24	NA	NA	NA	NA	NA	NA	chr20	23016056	23017314
cg07204280	CIDEA	0.0767647	0.417031	5.43258	2.44164	0.340266	2.34836e-26	1.02582e-23	NA	NA	NA	NA	NA	NA	chr18	12254317	12277594
cg16288089	TAC1	0.159569	0.530108	3.32213	1.73211	0.370539	2.64482e-26	1.13482e-23	NA	NA	NA	NA	NA	NA	chr7	97361219	97369784
cg06831576	CDH8	0.0944575	0.447431	4.73685	2.24393	0.352973	2.70641e-26	1.15441e-23	NA	NA	NA	NA	NA	NA	chr16	61681145	62070939
cg02374745	FBXO39	0.16817	0.531969	3.16328	1.66142	0.363799	2.74964e-26	1.16599e-23	NA	NA	NA	NA	NA	NA	chr17	6679541	6700420
cg17985646	TBX20	0.199882	0.601523	3.00939	1.58947	0.401641	2.88291e-26	1.2154e-23	NA	NA	NA	NA	NA	NA	chr7	35242041	35293758
cg06341513	LRRC10B	0.0556993	0.426908	7.6645	2.93819	0.371208	3.0657e-26	1.2703e-23	147.669	116.358	0.787969	-0.343789	0.503115	0.813776	chr11	61276271	61278482
cg26931862	HOXC12	0.122758	0.4374	3.5631	1.83313	0.314642	3.35766e-26	1.36019e-23	NA	NA	NA	NA	NA	NA	chr12	54348617	54352740
cg22399133	CRYGD	0.0873529	0.511046	5.85036	2.54853	0.423693	3.73511e-26	1.47682e-23	NA	NA	NA	NA	NA	NA	chr2	208986330	208989225
cg06410537	TLX3	0.190941	0.463738	2.4287	1.28018	0.272797	3.76145e-26	1.47682e-23	NA	NA	NA	NA	NA	NA	chr5	170736287	170739138
cg16709232	KIF19	0.0863595	0.429738	4.97616	2.31503	0.343379	4.22757e-26	1.62198e-23	NA	NA	NA	NA	NA	NA	chr17	72322348	72351959
cg17188046	T	0.144542	0.409862	2.83558	1.50364	0.265319	4.64244e-26	1.75332e-23	NA	NA	NA	NA	NA	NA	chr6	166571143	166582188
cg06304097	TCERG1L	0.0518105	0.4586	8.85149	3.14592	0.40679	5.08024e-26	1.87951e-23	NA	NA	NA	NA	NA	NA	chr10	132890653	133109984
cg22557662	PPP1R14A	0.158327	0.529123	3.34197	1.7407	0.370796	5.20109e-26	1.91445e-23	285.304	396.654	1.39029	0.475382	0.183152	0.541251	chr19	38741876	38747231
cg01893212	VWC2	0.123843	0.589862	4.76297	2.25186	0.466018	5.43912e-26	1.9711e-23	NA	NA	NA	NA	NA	NA	chr7	49813256	49952138
cg23842255	NEFH	0.165935	0.453431	2.73259	1.45027	0.287496	5.46373e-26	1.9711e-23	NA	NA	NA	NA	NA	NA	chr22	29876218	29887379
cg07790615	RYR2	0.0664444	0.403277	6.06939	2.60155	0.336832	5.57834e-26	1.99262e-23	NA	NA	NA	NA	NA	NA	chr1	237205504	238129359
cg12744820	OLIG3	0.183059	0.551338	3.01181	1.59063	0.36828	5.68473e-26	2.02067e-23	NA	NA	NA	NA	NA	NA	chr6	137813335	137815531
cg01972751	OLIG3	0.109366	0.486631	4.44956	2.15366	0.377265	6.32986e-26	2.20708e-23	NA	NA	NA	NA	NA	NA	chr6	137813335	137815531
cg08464190	CBLN1	0.129131	0.509738	3.94746	1.98092	0.380608	6.75349e-26	2.32093e-23	59.6577	36.4604	0.61116	-0.710378	0.163645	0.513616	chr16	49312435	49315742
cg09493505	VWC2	0.0971438	0.467892	4.81649	2.26798	0.370749	6.97117e-26	2.37635e-23	NA	NA	NA	NA	NA	NA	chr7	49813256	49952138
cg22643811	FAM19A5	0.15334	0.418062	2.72637	1.44698	0.264722	7.10406e-26	2.40718e-23	201.998	149.541	0.740307	-0.433804	0.293462	0.663164	chr22	48885271	49246724
cg17030173	MARCH11	0.0907059	0.436431	4.81149	2.26648	0.345725	7.81466e-26	2.61136e-23	NA	NA	NA	NA	NA	NA	chr5	16067247	16180871
cg04612444	PENK	0.145935	0.435338	2.98311	1.57682	0.289404	8.35815e-26	2.76746e-23	NA	NA	NA	NA	NA	NA	chr8	57349232	57359293
cg26673012	TBX20	0.110255	0.437	3.96354	1.98679	0.326745	8.40133e-26	2.76912e-23	NA	NA	NA	NA	NA	NA	chr7	35242041	35293758
cg09854626	LMF1	0.106993	0.400615	3.7443	1.9047	0.293622	8.77137e-26	2.83946e-23	533.32	558.425	1.04707	0.0663609	0.749257	0.925016	chr16	903633	1031318
cg17712694	MARCH11	0.0950719	0.470108	4.94476	2.3059	0.375036	9.06894e-26	2.90981e-23	NA	NA	NA	NA	NA	NA	chr5	16067247	16180871
cg25539045	FOXI2	0.124353	0.472631	3.80072	1.92627	0.348278	9.92096e-26	3.16219e-23	126.624	5.76914	0.0455611	-4.45605	0.159486	0.508556	chr10	129535498	129539450
cg03217795	PRKCB	0.112137	0.431723	3.84995	1.94484	0.319586	1.0949e-25	3.42217e-23	490.014	507.347	1.03537	0.0501485	0.871094	0.966441	chr16	23847321	24231932
cg20302133	KCNA3	0.106444	0.533154	5.00875	2.32445	0.426709	1.10793e-25	3.44803e-23	80.9657	76.6043	0.946133	-0.0798854	0.578987	0.851275	chr1	111214309	111217655
cg10188823	NEFH	0.0774052	0.443477	5.72929	2.51836	0.366072	1.14233e-25	3.52484e-23	NA	NA	NA	NA	NA	NA	chr22	29876218	29887379
cg10541864	HAND2	0.0961046	0.487738	5.07508	2.34343	0.391634	1.20729e-25	3.64766e-23	NA	NA	NA	NA	NA	NA	chr4	174446119	174451380
cg16232126	SLC5A7	0.158745	0.506354	3.18973	1.67343	0.347609	1.21236e-25	3.64779e-23	NA	NA	NA	NA	NA	NA	chr2	108602978	108630450
cg11139646	BMP8B	0.170484	0.445554	2.61347	1.38597	0.27507	1.47985e-25	4.32696e-23	273.179	303.06	1.10938	0.149758	0.583294	0.853742	chr1	40222853	40254533
cg21858380	C1QL2	0.109765	0.402354	3.6656	1.87405	0.292589	1.61174e-25	4.6378e-23	NA	NA	NA	NA	NA	NA	chr2	119913818	119916465
cg19712603	PCDH8	0.109222	0.4398	4.02665	2.00958	0.330578	1.66977e-25	4.76141e-23	NA	NA	NA	NA	NA	NA	chr13	53418108	53422775
cg04768697	CCDC105	0.173804	0.426015	2.45113	1.29344	0.252211	1.6744e-25	4.76141e-23	NA	NA	NA	NA	NA	NA	chr19	15121555	15134081
cg25614094	OPRK1	0.197301	0.591738	2.99917	1.58456	0.394438	1.69549e-25	4.78387e-23	NA	NA	NA	NA	NA	NA	chr8	54138283	54164257
cg07176264	SCTR	0.0593922	0.4068	6.84939	2.77598	0.347408	1.76409e-25	4.93898e-23	172.935	176.123	1.01844	0.0263567	0.891505	0.972131	chr2	120197418	120282070
cg19809499	FOXE3	0.0842745	0.488692	5.79882	2.53576	0.404418	1.87035e-25	5.11791e-23	NA	NA	NA	NA	NA	NA	chr1	47881743	47883723
cg07533148	TRIM58	0.184902	0.494754	2.67576	1.41995	0.309852	2.1421e-25	5.72795e-23	NA	NA	NA	NA	NA	NA	chr1	248020500	248041507
cg14696396	TM6SF1	0.122928	0.4434	3.60699	1.85079	0.320472	2.18892e-25	5.81412e-23	448.062	430.266	0.960283	-0.0584683	0.800169	0.941117	chr15	83776158	83813606
cg01587896	ISL1	0.109882	0.464969	4.23152	2.08118	0.355087	2.89954e-25	7.3005e-23	NA	NA	NA	NA	NA	NA	chr5	50678920	50690564
cg21530890	SOX8	0.15119	0.422338	2.79344	1.48204	0.271149	2.94682e-25	7.39387e-23	NA	NA	NA	NA	NA	NA	chr16	1031807	1036979
cg26163578	AC007228.1	0.177386	0.4504	2.5391	1.34432	0.273014	3.05842e-25	7.62114e-23	NA	NA	NA	NA	NA	NA	chr19	57154512	57167134
cg19064258	HS3ST2	0.18683	0.417492	2.23461	1.16002	0.230662	3.09966e-25	7.69746e-23	222.721	244.227	1.09656	0.132982	0.921966	0.978073	chr16	22825497	22927659
cg22620221	DPP6	0.136693	0.449215	3.28631	1.71647	0.312523	3.1768e-25	7.80879e-23	NA	NA	NA	NA	NA	NA	chr7	153584181	154685995
cg17059658	ADCYAP1	0.133725	0.437385	3.27076	1.70963	0.303659	3.1741e-25	7.80879e-23	77.7648	29.9851	0.385587	-1.37487	0.0399174	0.251931	chr18	904943	912173
cg07703401	HBQ1	0.121961	0.402846	3.30308	1.72381	0.280885	3.5448e-25	8.56814e-23	NA	NA	NA	NA	NA	NA	chr16	230451	231180
cg04711162	VSTM2B	0.159098	0.425031	2.6715	1.41765	0.265933	3.95637e-25	9.49962e-23	NA	NA	NA	NA	NA	NA	chr19	30017405	30055386
cg03044249	WBSCR17	0.0943464	0.490969	5.2039	2.37959	0.396623	4.2272e-25	1.00831e-22	227.187	129.731	0.571034	-0.808351	0.753556	0.927355	chr7	70597154	71178585
cg03063639	TM6SF1	0.0809216	0.530385	6.5543	2.71244	0.449463	4.86371e-25	1.13403e-22	448.062	430.266	0.960283	-0.0584683	0.800169	0.941117	chr15	83776158	83813606
cg09515953	PPP1R14A	0.187647	0.498046	2.65416	1.40826	0.310399	5.18709e-25	1.19787e-22	285.304	396.654	1.39029	0.475382	0.183152	0.541251	chr19	38741876	38747231
cg24980653	NKX1-1	0.0593268	0.422646	7.12403	2.83269	0.363319	5.53886e-25	1.25512e-22	NA	NA	NA	NA	NA	NA	chr4	1396719	1400119
cg21884231	SLC7A14	0.0748497	0.406123	5.42585	2.43985	0.331273	6.66359e-25	1.46584e-22	NA	NA	NA	NA	NA	NA	chr3	170182352	170303863
cg25722465	KDR	0.136608	0.415431	3.04105	1.60457	0.278823	8.35002e-25	1.77562e-22	15855.9	8017.9	0.505673	-0.983724	5.03534e-11	1.52045e-07	chr4	55944643	55991756
cg17694795	TCF24	0.167516	0.423	2.52513	1.33636	0.255484	8.54721e-25	1.79647e-22	NA	NA	NA	NA	NA	NA	chr8	67858735	67874825
cg23839136	WBSCR17	0.177928	0.407892	2.29246	1.19689	0.229964	9.66816e-25	1.99058e-22	227.187	129.731	0.571034	-0.808351	0.753556	0.927355	chr7	70597154	71178585
cg26460092	TM6SF1	0.0882222	0.484538	5.49225	2.4574	0.396316	1.02436e-24	2.08066e-22	448.062	430.266	0.960283	-0.0584683	0.800169	0.941117	chr15	83776158	83813606
cg15466862	SOX1	0.150033	0.438831	2.9249	1.54839	0.288798	1.02734e-24	2.08087e-22	NA	NA	NA	NA	NA	NA	chr13	112721912	112726020
cg03340466	FAM163A	0.18481	0.438815	2.37441	1.24757	0.254005	1.17346e-24	2.33125e-22	71.9396	51.7387	0.719196	-0.475543	0.339763	0.70502	chr1	179712297	179785333
cg18560204	BNC1	0.193425	0.415062	2.14585	1.10155	0.221637	1.37233e-24	2.64021e-22	NA	NA	NA	NA	NA	NA	chr15	83924654	83953466
cg13930892	ASCL2	0.151268	0.475323	3.14226	1.6518	0.324055	1.56998e-24	2.97243e-22	30.9547	39.8378	1.28697	0.36398	0.493828	0.810935	chr11	2289724	2292182
cg11224582	KCNA6	0.106699	0.462815	4.33757	2.11689	0.356116	1.66399e-24	3.10208e-22	NA	NA	NA	NA	NA	NA	chr12	4918341	4960277
cg10095242	OPRK1	0.182275	0.474338	2.60233	1.3798	0.292064	1.68884e-24	3.13203e-22	NA	NA	NA	NA	NA	NA	chr8	54138283	54164257
cg16620382	TTBK1	0.0811765	0.463062	5.70438	2.51207	0.381885	1.69414e-24	3.13237e-22	NA	NA	NA	NA	NA	NA	chr6	43211417	43255997
cg13545212	SLC13A5	0.0726667	0.406138	5.58906	2.48261	0.333472	1.69766e-24	3.13237e-22	NA	NA	NA	NA	NA	NA	chr17	6588031	6616886
cg02604524	CCDC48	0.0575621	0.434154	7.54236	2.91502	0.376592	1.8151e-24	3.30082e-22	143.092	93.7251	0.655	-0.610433	0.159255	0.508494	chr3	128720471	128759585
cg03881775	ZIC1	0.150052	0.419354	2.79472	1.4827	0.269302	1.81626e-24	3.30082e-22	NA	NA	NA	NA	NA	NA	chr3	147111208	147228080
cg11260046	MEI1	0.138268	0.4578	3.31096	1.72725	0.319532	1.88222e-24	3.40362e-22	NA	NA	NA	NA	NA	NA	chr22	42095502	42195460
cg23536473	FERD3L	0.132124	0.432262	3.27163	1.71001	0.300137	2.07333e-24	3.67589e-22	NA	NA	NA	NA	NA	NA	chr7	19184404	19185044
cg27606499	ZIC1	0.182542	0.473723	2.59514	1.37581	0.291181	2.34179e-24	4.05274e-22	NA	NA	NA	NA	NA	NA	chr3	147111208	147228080
cg03893271	WBSCR17	0.174529	0.418323	2.39686	1.26115	0.243794	2.45733e-24	4.2298e-22	227.187	129.731	0.571034	-0.808351	0.753556	0.927355	chr7	70597154	71178585
cg24319902	SFRP1	0.140595	0.424	3.01576	1.59252	0.283405	2.80281e-24	4.70464e-22	1007.82	249.733	0.247795	-2.01278	0.14924	0.491603	chr8	41119480	41167016
cg20129213	RIMS2	0.107673	0.471354	4.37763	2.13015	0.363681	3.47677e-24	5.61968e-22	NA	NA	NA	NA	NA	NA	chr8	104512975	105268322
cg17800654	DMRTA2	0.142268	0.478677	3.36461	1.75044	0.336409	3.4797e-24	5.61968e-22	NA	NA	NA	NA	NA	NA	chr1	50883221	50889172
cg24989962	PTGDR	0.183203	0.473523	2.5847	1.36999	0.29032	3.52697e-24	5.68337e-22	64.0914	76.8157	1.19853	0.261269	0.640951	0.877476	chr14	52734430	52743442
cg21700532	SDR16C5	0.125281	0.434	3.46421	1.79253	0.308719	3.56254e-24	5.72629e-22	NA	NA	NA	NA	NA	NA	chr8	57212568	57233335
cg16729415	GJD2	0.080549	0.516031	6.40642	2.67952	0.435482	4.02819e-24	6.34992e-22	NA	NA	NA	NA	NA	NA	chr15	35043232	35047166
cg00637687	PCSK1	0.168627	0.414492	2.45804	1.29751	0.245865	4.5362e-24	6.96893e-22	NA	NA	NA	NA	NA	NA	chr5	95726118	95769847
cg18249173	TBX20	0.181608	0.495785	2.72997	1.44889	0.314177	4.93424e-24	7.48528e-22	NA	NA	NA	NA	NA	NA	chr7	35242041	35293758
cg00926400	BOLL	0.17483	0.439246	2.51242	1.32908	0.264416	5.05494e-24	7.58901e-22	NA	NA	NA	NA	NA	NA	chr2	198591602	198651486
cg18146843	FAM159A	0.114706	0.409246	3.56779	1.83503	0.29454	5.41723e-24	8.01673e-22	NA	NA	NA	NA	NA	NA	chr1	53099015	53135355
cg16963144	FOXA2	0.122843	0.427554	3.48049	1.79929	0.304711	5.68829e-24	8.3497e-22	26.2633	54.3856	2.07078	1.05017	0.0377186	0.243663	chr20	22561642	22566093
cg25764899	TAL1	0.137824	0.514877	3.73577	1.90141	0.377053	7.04326e-24	1.00561e-21	439.91	236.702	0.538069	-0.894137	0.00307303	0.0494291	chr1	47681962	47697892
cg18932798	INA	0.119242	0.492077	4.12671	2.04499	0.372835	7.11032e-24	1.01295e-21	NA	NA	NA	NA	NA	NA	chr10	105036919	105050108
cg00824018	INA	0.158778	0.438708	2.76303	1.46625	0.27993	7.23641e-24	1.02156e-21	NA	NA	NA	NA	NA	NA	chr10	105036919	105050108
cg26818735	TWIST1	0.197915	0.519538	2.62506	1.39235	0.321623	7.8661e-24	1.08854e-21	61.0854	63.201	1.03463	0.0491184	0.711621	0.911503	chr7	19060613	19157295
cg18952647	BNC1	0.132458	0.405938	3.06467	1.61573	0.273481	8.43323e-24	1.15164e-21	NA	NA	NA	NA	NA	NA	chr15	83924654	83953466
cg02490516	FAM150A	0.137824	0.407662	2.95785	1.56455	0.269838	8.72936e-24	1.1876e-21	NA	NA	NA	NA	NA	NA	chr8	53446596	53478067
cg23353952	NEFH	0.113915	0.401492	3.52449	1.81741	0.287577	9.16353e-24	1.24145e-21	NA	NA	NA	NA	NA	NA	chr22	29876218	29887379
cg26983710	GALNT13	0.126242	0.402215	3.18607	1.67178	0.275974	9.17653e-24	1.24145e-21	NA	NA	NA	NA	NA	NA	chr2	154728425	155310361
cg19776515	SDR16C5	0.101935	0.412769	4.04935	2.01769	0.310835	9.36227e-24	1.26187e-21	NA	NA	NA	NA	NA	NA	chr8	57212568	57233335
cg11595545	KCNA3	0.0537647	0.4218	7.8453	2.97183	0.368035	9.50193e-24	1.27385e-21	80.9657	76.6043	0.946133	-0.0798854	0.578987	0.851275	chr1	111214309	111217655
cg23572908	VIPR2	0.197889	0.556431	2.81183	1.49151	0.358542	9.50383e-24	1.27385e-21	NA	NA	NA	NA	NA	NA	chr7	158820865	158937649
cg17496659	TP73	0.155157	0.428415	2.76118	1.46528	0.273259	1.07161e-23	1.40263e-21	NA	NA	NA	NA	NA	NA	chr1	3569083	3652765
cg17037282	ISL1	0.128007	0.442	3.45295	1.78783	0.313993	1.12341e-23	1.45467e-21	NA	NA	NA	NA	NA	NA	chr5	50678920	50690564
cg07382554	SALL3	0.196471	0.494262	2.5157	1.33096	0.297791	1.16453e-23	1.49722e-21	NA	NA	NA	NA	NA	NA	chr18	76740274	76762677
cg07369190	PCP4L1	0.167451	0.412477	2.46327	1.30057	0.245026	1.24949e-23	1.60078e-21	NA	NA	NA	NA	NA	NA	chr1	161228516	161255240
cg07780095	ALX1	0.126261	0.479446	3.79725	1.92495	0.353185	1.29586e-23	1.64565e-21	NA	NA	NA	NA	NA	NA	chr12	85673884	85695562
cg27555582	ABCC9	0.123882	0.500077	4.03671	2.01318	0.376195	1.40599e-23	1.7578e-21	1470.44	1205.63	0.81991	-0.286463	0.0471597	0.273523	chr12	21950334	22094336
cg27265170	DMRTA2	0.155712	0.426108	2.7365	1.45233	0.270395	1.4941e-23	1.85834e-21	NA	NA	NA	NA	NA	NA	chr1	50883221	50889172
cg05768427	KBTBD12	0.161582	0.472015	2.92122	1.54657	0.310434	1.53003e-23	1.89462e-21	NA	NA	NA	NA	NA	NA	chr3	127634074	127706514
cg04425920	DRGX	0.198569	0.529523	2.6667	1.41506	0.330954	1.5311e-23	1.89462e-21	NA	NA	NA	NA	NA	NA	chr10	50572236	50603986
cg00663077	ZFP42	0.155333	0.461138	2.9687	1.56983	0.305805	1.66251e-23	2.02271e-21	NA	NA	NA	NA	NA	NA	chr4	188916924	188926204
cg18197392	SSTR4	0.10002	0.428246	4.28162	2.09816	0.328227	1.67668e-23	2.03094e-21	NA	NA	NA	NA	NA	NA	chr20	23016056	23017314
cg02878244	DBX1	0.136647	0.461677	3.37861	1.75643	0.32503	1.74069e-23	2.08978e-21	NA	NA	NA	NA	NA	NA	chr11	20177700	20182159
cg21512644	NPY2R	0.126451	0.417954	3.30526	1.72477	0.291503	1.89315e-23	2.2358e-21	NA	NA	NA	NA	NA	NA	chr4	156129780	156138230
cg19098763	ELAVL4	0.131078	0.441492	3.36815	1.75196	0.310414	1.91573e-23	2.25669e-21	NA	NA	NA	NA	NA	NA	chr1	50513685	50669458
cg04304705	FAM19A5	0.152039	0.449846	2.95875	1.56499	0.297807	2.12982e-23	2.45922e-21	201.998	149.541	0.740307	-0.433804	0.293462	0.663164	chr22	48885271	49246724
cg05452406	GCM2	0.119824	0.450738	3.76169	1.91138	0.330915	2.72488e-23	3.04922e-21	NA	NA	NA	NA	NA	NA	chr6	10873455	10882174
cg11552072	ANKRD30BL	0.195203	0.481015	2.46419	1.30111	0.285813	2.9632e-23	3.27547e-21	NA	NA	NA	NA	NA	NA	chr2	132905163	133015542
cg25189564	VIPR2	0.107967	0.434369	4.02315	2.00833	0.326402	3.32627e-23	3.62703e-21	NA	NA	NA	NA	NA	NA	chr7	158820865	158937649
cg19851909	GPR83	0.173993	0.409385	2.35287	1.23442	0.235391	3.45008e-23	3.74514e-21	NA	NA	NA	NA	NA	NA	chr11	94110476	94134585
cg06572465	PCDHGA11	0.199843	0.469877	2.35123	1.23341	0.270034	3.6646e-23	3.93823e-21	NA	NA	NA	NA	NA	NA	chr5	140800761	140891835
cg16573782	CBLN1	0.190647	0.498508	2.61482	1.38671	0.307861	3.70962e-23	3.97922e-21	59.6577	36.4604	0.61116	-0.710378	0.163645	0.513616	chr16	49312435	49315742
cg23065934	MARCH11	0.104895	0.400585	3.8189	1.93316	0.295689	4.94876e-23	5.17821e-21	NA	NA	NA	NA	NA	NA	chr5	16067247	16180871
cg17331296	ANK1	0.0605033	0.404	6.67733	2.73927	0.343497	5.50262e-23	5.70016e-21	599.052	500.005	0.834661	-0.260738	0.368641	0.727969	chr8	41510738	41754280
cg09656848	LRRC10B	0.13017	0.470523	3.61468	1.85387	0.340353	5.5832e-23	5.75896e-21	147.669	116.358	0.787969	-0.343789	0.503115	0.813776	chr11	61276271	61278482
cg06382344	SLC4A10	0.102758	0.411569	4.00522	2.00188	0.308811	5.73524e-23	5.874e-21	NA	NA	NA	NA	NA	NA	chr2	162280842	162841792
cg23881278	DRD2	0.089098	0.419646	4.70994	2.23571	0.330548	6.11481e-23	6.18414e-21	NA	NA	NA	NA	NA	NA	chr11	113280317	113346413
cg05678749	GABRG3	0.165562	0.417108	2.51934	1.33305	0.251546	6.27763e-23	6.31359e-21	NA	NA	NA	NA	NA	NA	chr15	27216428	27778373
cg21306240	EPHA10	0.111647	0.430215	3.85335	1.94611	0.318568	6.42134e-23	6.44918e-21	NA	NA	NA	NA	NA	NA	chr1	38179551	38230805
cg19761848	AC079135.1	0.0823203	0.403985	4.90747	2.29498	0.321664	6.861e-23	6.86223e-21	NA	NA	NA	NA	NA	NA	chr2	237076089	237203570
cg26990587	ACTL6B	0.119124	0.401508	3.3705	1.75296	0.282384	9.11693e-23	8.86187e-21	NA	NA	NA	NA	NA	NA	chr7	100240719	100254084
cg01228134	ECEL1	0.199203	0.416831	2.0925	1.06523	0.217628	9.78027e-23	9.38091e-21	NA	NA	NA	NA	NA	NA	chr2	233344536	233352538
cg00295572	TP73	0.112294	0.438954	3.90897	1.96679	0.32666	9.99925e-23	9.52696e-21	NA	NA	NA	NA	NA	NA	chr1	3569083	3652765
cg25234732	NUPR1L	0.190719	0.445492	2.33586	1.22395	0.254773	1.00114e-22	9.52696e-21	17.3192	6.45077	0.372464	-1.42483	0.337103	0.703151	chr7	56182373	56184093
cg25339566	TCTEX1D1	0.124621	0.456062	3.65959	1.87168	0.331441	1.09389e-22	1.02748e-20	NA	NA	NA	NA	NA	NA	chr1	67218141	67244470
cg20555682	LMO1	0.11749	0.406508	3.45993	1.79074	0.289017	1.36572e-22	1.23716e-20	13.5576	41.3421	3.04937	1.60851	0.00426488	0.0608898	chr11	8245850	8290263
cg21200408	NKX2-4	0.127601	0.428462	3.35781	1.74752	0.30086	1.48551e-22	1.33151e-20	NA	NA	NA	NA	NA	NA	chr20	21376004	21378666
cg14564076	DPP6	0.199686	0.493785	2.4728	1.30615	0.294098	1.57352e-22	1.40118e-20	NA	NA	NA	NA	NA	NA	chr7	153584181	154685995
cg03921753	GSG1L	0.177144	0.452815	2.5562	1.354	0.275672	1.74763e-22	1.53607e-20	NA	NA	NA	NA	NA	NA	chr16	27798849	28074830
cg16027761	PCDH8	0.165889	0.421046	2.53812	1.34376	0.255157	1.82991e-22	1.60063e-20	NA	NA	NA	NA	NA	NA	chr13	53418108	53422775
cg09949775	COMP	0.188752	0.485185	2.57049	1.36204	0.296433	1.96268e-22	1.69833e-20	235.141	324.5	1.38002	0.464694	0.678075	0.89744	chr19	18893582	18902123
cg00812833	PLD5	0.119176	0.418062	3.50792	1.81062	0.298885	2.0302e-22	1.74577e-20	NA	NA	NA	NA	NA	NA	chr1	242251688	242687998
cg04917181	TSPYL5	0.0942092	0.425892	4.52071	2.17655	0.331683	2.04389e-22	1.75188e-20	860.48	551.02	0.640364	-0.643037	0.00447669	0.0631546	chr8	98285716	98290176
cg10658542	SYT10	0.127301	0.436277	3.42714	1.777	0.308976	2.22497e-22	1.8848e-20	NA	NA	NA	NA	NA	NA	chr12	33527172	33592754
cg04363624	TAL1	0.179908	0.450754	2.50546	1.32508	0.270845	2.25197e-22	1.90545e-20	439.91	236.702	0.538069	-0.894137	0.00307303	0.0494291	chr1	47681962	47697892
cg02547394	SOX1	0.16634	0.416585	2.50442	1.32448	0.250245	2.27873e-22	1.92137e-20	NA	NA	NA	NA	NA	NA	chr13	112721912	112726020
cg15044957	KCNA4	0.150386	0.480908	3.19783	1.67709	0.330522	2.33133e-22	1.96116e-20	NA	NA	NA	NA	NA	NA	chr11	30031287	30038570
cg20779964	CBLN4	0.180451	0.471046	2.61038	1.38426	0.290595	2.41487e-22	2.0201e-20	195.65	292.64	1.49574	0.580855	0.379377	0.735591	chr20	54572495	54580528
cg26938272	SIM2	0.145399	0.443015	3.0469	1.60734	0.297617	2.70859e-22	2.23191e-20	68.098	85.1068	1.24977	0.321663	0.290229	0.659681	chr21	38071432	38122218
cg18206017	RIPPLY2	0.133745	0.415338	3.10545	1.6348	0.281593	3.60603e-22	2.85062e-20	NA	NA	NA	NA	NA	NA	chr6	84562984	84567234
cg03757784	HS3ST2	0.182719	0.411862	2.25407	1.17253	0.229143	3.6091e-22	2.85062e-20	222.721	244.227	1.09656	0.132982	0.921966	0.978073	chr16	22825497	22927659
cg01915516	TP73	0.0944248	0.400923	4.24595	2.08609	0.306498	3.98451e-22	3.11346e-20	NA	NA	NA	NA	NA	NA	chr1	3569083	3652765
cg08965276	LMF1	0.124176	0.404831	3.26012	1.70493	0.280654	4.1423e-22	3.23327e-20	533.32	558.425	1.04707	0.0663609	0.749257	0.925016	chr16	903633	1031318
cg02093112	FBXO39	0.121007	0.430723	3.5595	1.83168	0.309717	4.59107e-22	3.54917e-20	NA	NA	NA	NA	NA	NA	chr17	6679541	6700420
cg18375421	C5ORF52	0.185196	0.413831	2.23455	1.15999	0.228635	4.74648e-22	3.65373e-20	NA	NA	NA	NA	NA	NA	chr5	157098560	157107151
cg10182317	CLVS2	0.116516	0.454877	3.90398	1.96494	0.338361	5.57516e-22	4.21117e-20	NA	NA	NA	NA	NA	NA	chr6	123317115	123385612
cg20677901	TP73	0.147556	0.448308	3.03823	1.60323	0.300752	5.71322e-22	4.28864e-20	NA	NA	NA	NA	NA	NA	chr1	3569083	3652765
cg16642284	FOXI2	0.0968105	0.413462	4.27084	2.09452	0.316651	6.15747e-22	4.58887e-20	126.624	5.76914	0.0455611	-4.45605	0.159486	0.508556	chr10	129535498	129539450
cg08812189	ZIC1	0.158752	0.4064	2.55997	1.35613	0.247648	6.32725e-22	4.69698e-20	NA	NA	NA	NA	NA	NA	chr3	147111208	147228080
cg19186145	SIX3	0.116477	0.507031	4.35305	2.12203	0.390554	7.03093e-22	5.10344e-20	NA	NA	NA	NA	NA	NA	chr2	45168901	45173216
cg07918545	FOXI2	0.192817	0.482877	2.50433	1.32442	0.29006	8.41714e-22	5.97213e-20	126.624	5.76914	0.0455611	-4.45605	0.159486	0.508556	chr10	129535498	129539450
cg26735846	HMX3	0.144641	0.427108	2.95289	1.56213	0.282467	8.70685e-22	6.15961e-20	NA	NA	NA	NA	NA	NA	chr10	124895477	124899995
cg13786089	ZFR2	0.173516	0.4496	2.59111	1.37357	0.276084	8.90289e-22	6.27382e-20	NA	NA	NA	NA	NA	NA	chr19	3804021	3869030
cg10389229	IRAK3	0.186229	0.427892	2.29767	1.20017	0.241664	1.02072e-21	7.00901e-20	777.712	515.586	0.662953	-0.593022	0.0185689	0.159282	chr12	66582658	66648402
cg25963041	ZFP28	0.124065	0.528154	4.25706	2.08986	0.404088	1.08056e-21	7.3297e-20	291.752	179.756	0.616127	-0.698701	0.0650281	0.32544	chr19	57050316	57068169
cg20912770	ASCL2	0.184712	0.410815	2.22408	1.15321	0.226103	1.15753e-21	7.77908e-20	30.9547	39.8378	1.28697	0.36398	0.493828	0.810935	chr11	2289724	2292182
cg26074603	KCNC2	0.196974	0.487292	2.47389	1.30678	0.290318	1.18352e-21	7.90973e-20	NA	NA	NA	NA	NA	NA	chr12	75433856	75603648
cg11873482	TAC1	0.172523	0.432692	2.50803	1.32655	0.260169	1.25214e-21	8.34417e-20	NA	NA	NA	NA	NA	NA	chr7	97361219	97369784
cg26281453	TBX21	0.151928	0.471323	3.10228	1.63333	0.319395	1.28036e-21	8.45565e-20	95.7218	103.758	1.08395	0.116301	0.920996	0.977927	chr17	45810609	45823485
cg27120816	CDH8	0.151902	0.420969	2.77132	1.47057	0.269067	1.55282e-21	9.99994e-20	NA	NA	NA	NA	NA	NA	chr16	61681145	62070939
cg24851854	TACSTD2	0.182667	0.501923	2.74775	1.45825	0.319256	1.64341e-21	1.05273e-19	2060.62	663.83	0.322151	-1.63419	0.0461424	0.27009	chr1	59041098	59043166
cg05346841	PRDM2	0.140542	0.486108	3.4588	1.79027	0.345565	1.6926e-21	1.07947e-19	1425.7	1241	0.870445	-0.200175	0.300873	0.669281	chr1	14026692	14151560
cg00529958	ZIC5	0.194124	0.433015	2.23061	1.15744	0.238891	1.77868e-21	1.1294e-19	NA	NA	NA	NA	NA	NA	chr13	100617450	100624163
cg07589773	IKZF1	0.0868301	0.505123	5.81738	2.54037	0.418293	1.87354e-21	1.18342e-19	1031.43	1169.52	1.13389	0.181274	0.675973	0.896932	chr7	50343719	50472799
cg23808946	SIX3	0.112268	0.446631	3.97826	1.99214	0.334363	1.93313e-21	1.21681e-19	NA	NA	NA	NA	NA	NA	chr2	45168901	45173216
cg05297854	TRABD	0.140915	0.478738	3.39736	1.76441	0.337823	2.1036e-21	1.31272e-19	884.784	1289.08	1.45694	0.542942	0.00799962	0.0916467	chr22	50624343	50638027
cg14328457	STAC2	0.167582	0.464815	2.77366	1.47179	0.297234	2.15428e-21	1.33744e-19	1550.32	258.323	0.166626	-2.58532	0.0315439	0.222272	chr17	37366788	37382125
cg08490115	KCNA4	0.158098	0.468723	2.96476	1.56792	0.310625	2.25298e-21	1.39276e-19	NA	NA	NA	NA	NA	NA	chr11	30031287	30038570
cg08572611	ACTL6B	0.15419	0.447969	2.90532	1.53869	0.29378	2.27855e-21	1.40378e-19	NA	NA	NA	NA	NA	NA	chr7	100240719	100254084
cg24927800	DES	0.118314	0.431754	3.64923	1.86759	0.31344	2.30083e-21	1.4139e-19	427.104	1063.61	2.49027	1.3163	0.172639	0.526829	chr2	220283098	220291461
cg03469054	TMEM132D	0.17198	0.408477	2.37514	1.24801	0.236497	2.91708e-21	1.7403e-19	NA	NA	NA	NA	NA	NA	chr12	129556269	130388211
cg21800232	ANKRD34B	0.162922	0.407015	2.49823	1.32091	0.244094	2.9535e-21	1.7598e-19	NA	NA	NA	NA	NA	NA	chr5	79852573	79866307
cg01815671	CCDC37	0.0975556	0.415092	4.25493	2.08914	0.317537	3.00541e-21	1.78926e-19	NA	NA	NA	NA	NA	NA	chr3	126113781	126155399
cg11711420	ISL1	0.150771	0.447954	2.97108	1.57099	0.297183	3.08795e-21	1.83237e-19	NA	NA	NA	NA	NA	NA	chr5	50678920	50690564
cg14200170	ADCYAP1	0.130046	0.415785	3.19722	1.67682	0.285739	3.22506e-21	1.90129e-19	77.7648	29.9851	0.385587	-1.37487	0.0399174	0.251931	chr18	904943	912173
cg09823095	KLF14	0.085732	0.424231	4.94833	2.30694	0.338499	3.43146e-21	2.00828e-19	NA	NA	NA	NA	NA	NA	chr7	130417400	130418888
cg00565688	TP73	0.174379	0.463185	2.65619	1.40936	0.288806	3.45017e-21	2.01597e-19	NA	NA	NA	NA	NA	NA	chr1	3569083	3652765
cg06401021	HMGCLL1	0.143791	0.478662	3.32887	1.73503	0.334871	3.61147e-21	2.09736e-19	NA	NA	NA	NA	NA	NA	chr6	55299166	55444012
cg20787173	EYA4	0.161889	0.496862	3.06915	1.61784	0.334973	3.77471e-21	2.17927e-19	98.5634	74.3093	0.753924	-0.407509	0.459967	0.789562	chr6	133561735	133853258
cg17714025	KCNA4	0.161987	0.404277	2.49574	1.31947	0.24229	4.08773e-21	2.34319e-19	NA	NA	NA	NA	NA	NA	chr11	30031287	30038570
cg11342452	NKX6-2	0.147229	0.403631	2.74152	1.45498	0.256402	4.1773e-21	2.38511e-19	NA	NA	NA	NA	NA	NA	chr10	134598296	134599556
cg10272601	WNK2	0.0833987	0.407969	4.89179	2.29036	0.324571	4.51863e-21	2.56585e-19	NA	NA	NA	NA	NA	NA	chr9	95947197	96082854
cg08077337	FZD7	0.129928	0.430246	3.31142	1.72745	0.300318	6.51801e-21	3.54835e-19	677.197	610.479	0.901479	-0.149634	0.621087	0.866611	chr2	202899309	202903160
cg26727693	AVPR1A	0.197935	0.452554	2.28638	1.19307	0.254619	6.74681e-21	3.66191e-19	234.013	91.2458	0.389918	-1.35876	0.0374992	0.243042	chr12	63539013	63544722
cg10269548	RASL11B	0.17132	0.432508	2.52456	1.33603	0.261187	6.82582e-21	3.70203e-19	104.898	148.886	1.41933	0.505214	0.457659	0.787326	chr4	53728456	53733000
cg19628148	CCDC37	0.124549	0.403923	3.24309	1.69737	0.279374	7.44681e-21	3.99401e-19	NA	NA	NA	NA	NA	NA	chr3	126113781	126155399
cg21907579	TBX5	0.193961	0.4282	2.20766	1.14252	0.234239	7.5436e-21	4.03697e-19	NA	NA	NA	NA	NA	NA	chr12	114791735	114846247
cg14159026	BVES	0.0960523	0.453877	4.72531	2.24041	0.357825	8.27358e-21	4.40486e-19	169.293	150.017	0.886141	-0.174392	0.730654	0.918221	chr6	105544696	105585049
cg00922376	PRDM2	0.147124	0.534154	3.63063	1.86022	0.38703	8.36832e-21	4.44551e-19	1425.7	1241	0.870445	-0.200175	0.300873	0.669281	chr1	14026692	14151560
cg26381364	C12ORF42	0.115686	0.406938	3.5176	1.81459	0.291252	8.6072e-21	4.56572e-19	NA	NA	NA	NA	NA	NA	chr12	103631368	103889749
cg17891759	ZNF732	0.165275	0.402185	2.43343	1.28299	0.23691	1.07556e-20	5.60691e-19	NA	NA	NA	NA	NA	NA	chr4	264463	299110
cg24575234	CHRM2	0.197895	0.435923	2.2028	1.13934	0.238028	1.28323e-20	6.55749e-19	NA	NA	NA	NA	NA	NA	chr7	136553415	136705002
cg10406295	SFRP1	0.139196	0.411677	2.95753	1.56439	0.272481	1.32479e-20	6.75559e-19	1007.82	249.733	0.247795	-2.01278	0.14924	0.491603	chr8	41119480	41167016
cg06274159	ZFP42	0.17166	0.4434	2.58301	1.36905	0.27174	1.44855e-20	7.3249e-19	NA	NA	NA	NA	NA	NA	chr4	188916924	188926204
cg24085946	NFASC	0.140137	0.418462	2.98608	1.57825	0.278324	1.51452e-20	7.63186e-19	1653.31	1177.58	0.712256	-0.489533	0.0118622	0.121523	chr1	204797778	204991950
cg05495949	RADIL	0.128641	0.401954	3.12463	1.64368	0.273313	1.84267e-20	9.07709e-19	NA	NA	NA	NA	NA	NA	chr7	4836685	4923350
cg06192497	OTX1	0.181863	0.454662	2.50003	1.32194	0.272799	2.04066e-20	9.9445e-19	NA	NA	NA	NA	NA	NA	chr2	63277191	63284971
cg07536910	EVX2	0.185222	0.494538	2.66997	1.41683	0.309316	2.27744e-20	1.10169e-18	NA	NA	NA	NA	NA	NA	chr2	176942199	176948641
cg13193455	POU3F1	0.191222	0.428585	2.24129	1.16433	0.237362	2.35268e-20	1.13582e-18	NA	NA	NA	NA	NA	NA	chr1	38509522	38512450
cg22029275	FAM123A	0.144333	0.438985	3.04146	1.60477	0.294651	2.83249e-20	1.34378e-18	NA	NA	NA	NA	NA	NA	chr13	25735821	25746426
cg19194373	EDN3	0.151359	0.419215	2.76967	1.46971	0.267856	2.83638e-20	1.34428e-18	NA	NA	NA	NA	NA	NA	chr20	57875481	57901047
cg05378938	TDRD5	0.167248	0.464723	2.77864	1.47438	0.297475	3.09556e-20	1.45664e-18	NA	NA	NA	NA	NA	NA	chr1	179560747	179660407
cg04415176	HOXD13	0.117693	0.407954	3.46626	1.79338	0.290261	3.19168e-20	1.49508e-18	NA	NA	NA	NA	NA	NA	chr2	176957618	176960666
cg00963169	ELAVL4	0.14134	0.401431	2.84018	1.50598	0.260091	3.56058e-20	1.65082e-18	NA	NA	NA	NA	NA	NA	chr1	50513685	50669458
cg14631834	DSC3	0.182111	0.4318	2.37108	1.24554	0.249689	3.60549e-20	1.66951e-18	NA	NA	NA	NA	NA	NA	chr18	28569973	28622781
cg07553626	LPAR3	0.147654	0.433	2.93254	1.55215	0.285346	4.15002e-20	1.89384e-18	NA	NA	NA	NA	NA	NA	chr1	85277284	85358896
cg27049766	ZNF154	0.127013	0.413492	3.25551	1.70288	0.286479	4.38574e-20	1.986e-18	294.986	184.735	0.626249	-0.675192	0.049652	0.279392	chr19	58208734	58220579
cg01281157	GRM6	0.191641	0.416062	2.17105	1.11839	0.224421	4.89383e-20	2.18504e-18	NA	NA	NA	NA	NA	NA	chr5	178405327	178423207
cg03017520	DSC3	0.143954	0.423462	2.94164	1.55662	0.279507	5.75612e-20	2.52507e-18	NA	NA	NA	NA	NA	NA	chr18	28569973	28622781
cg16652063	SLC13A5	0.197379	0.402831	2.0409	1.0292	0.205452	5.82455e-20	2.552e-18	NA	NA	NA	NA	NA	NA	chr17	6588031	6616886
cg18884037	KHDRBS2	0.135647	0.400723	2.95416	1.56275	0.265076	6.07552e-20	2.64756e-18	NA	NA	NA	NA	NA	NA	chr6	62390138	62996132
cg14780632	GAL3ST3	0.132804	0.481769	3.62767	1.85904	0.348965	6.19581e-20	2.69028e-18	14.583	7.73438	0.53037	-0.914929	0.379447	0.735622	chr11	65809422	65816651
cg08102508	IQSEC1	0.19602	0.407754	2.08017	1.0567	0.211734	6.56447e-20	2.84015e-18	2734.14	2015.04	0.736991	-0.440282	0.0147226	0.137707	chr3	12938718	13114617
cg06523224	BNC1	0.165719	0.445769	2.68991	1.42756	0.28005	6.62876e-20	2.86455e-18	NA	NA	NA	NA	NA	NA	chr15	83924654	83953466
cg25984671	TCF15	0.187209	0.501708	2.67993	1.4222	0.314499	7.0023e-20	3.00983e-18	48.8735	39.8987	0.816366	-0.292712	0.714857	0.912267	chr20	584440	591042
cg16924616	DLX5	0.179379	0.479938	2.67555	1.41984	0.300559	8.23361e-20	3.4813e-18	105.736	123.678	1.16969	0.226124	0.565222	0.844318	chr7	96649703	96654409
cg07681938	CDH8	0.189529	0.416062	2.19523	1.13438	0.226532	8.60473e-20	3.63187e-18	NA	NA	NA	NA	NA	NA	chr16	61681145	62070939
cg13530938	AC016757.3	0.186582	0.475938	2.55083	1.35097	0.289357	9.28052e-20	3.87083e-18	NA	NA	NA	NA	NA	NA	chr2	239133192	239140318
cg05924652	GLP1R	0.192588	0.463077	2.40449	1.26573	0.270489	1.0455e-19	4.29531e-18	NA	NA	NA	NA	NA	NA	chr6	39016573	39055519
cg11469098	EFCAB1	0.176072	0.412	2.33995	1.22648	0.235928	1.32441e-19	5.34271e-18	NA	NA	NA	NA	NA	NA	chr8	49623347	49647870
cg05651960	KLF14	0.109026	0.4064	3.72755	1.89823	0.297374	1.40889e-19	5.6357e-18	NA	NA	NA	NA	NA	NA	chr7	130417400	130418888
cg10355837	CACNG4	0.109935	0.416769	3.79106	1.9226	0.306835	1.43354e-19	5.70843e-18	NA	NA	NA	NA	NA	NA	chr17	64961025	65029514
cg00840332	LEP	0.178033	0.442046	2.48295	1.31205	0.264013	1.53904e-19	6.09854e-18	NA	NA	NA	NA	NA	NA	chr7	127881336	127897681
cg09568464	ZNF582	0.136608	0.446631	3.26944	1.70904	0.310023	1.60838e-19	6.34194e-18	107.198	71.9053	0.670771	-0.576108	0.230491	0.599968	chr19	56887412	56904914
cg11294513	ZNF154	0.163961	0.442369	2.69802	1.4319	0.278408	1.6419e-19	6.46009e-18	294.986	184.735	0.626249	-0.675192	0.049652	0.279392	chr19	58208734	58220579
cg06469345	DRD5	0.171431	0.401662	2.34299	1.22835	0.23023	1.67752e-19	6.58592e-18	NA	NA	NA	NA	NA	NA	chr4	9783257	9785632
cg22869726	OLIG2	0.154791	0.460908	2.97762	1.57416	0.306117	1.76951e-19	6.8948e-18	NA	NA	NA	NA	NA	NA	chr21	34398152	34401504
cg06062984	ZNF385D	0.174235	0.4288	2.46104	1.29927	0.254565	1.82834e-19	7.08217e-18	118.078	170.639	1.44514	0.53121	0.180409	0.537794	chr3	21459914	22414812
cg23290344	NEFM	0.159745	0.450277	2.81872	1.49504	0.290532	2.07649e-19	7.92903e-18	81.0791	85.7747	1.05791	0.0812223	0.592474	0.855901	chr8	24770524	24776607
cg09793121	OLIG2	0.157105	0.427523	2.72126	1.44428	0.270419	2.26247e-19	8.57598e-18	NA	NA	NA	NA	NA	NA	chr21	34398152	34401504
cg21264189	POU4F1	0.115608	0.429677	3.71668	1.89401	0.314069	2.45574e-19	9.26499e-18	NA	NA	NA	NA	NA	NA	chr13	79173226	79177673
cg05491001	LPHN3	0.146144	0.429215	2.93694	1.55431	0.283072	2.60195e-19	9.74058e-18	255.255	236.484	0.926463	-0.110194	0.463759	0.790963	chr4	62066975	62938184
cg08158952	ZNF835	0.132882	0.403892	3.03947	1.60382	0.27101	2.98482e-19	1.10725e-17	68.9177	36.6853	0.532306	-0.909673	0.100838	0.405463	chr19	57174019	57183151
cg04919274	GPR149	0.187667	0.403077	2.14783	1.10288	0.21541	3.08466e-19	1.14005e-17	NA	NA	NA	NA	NA	NA	chr3	154055460	154147504
cg00849610	TBX4	0.177438	0.403138	2.272	1.18396	0.225701	3.32198e-19	1.22092e-17	NA	NA	NA	NA	NA	NA	chr17	59529764	59562471
cg21053529	GJD2	0.182248	0.416077	2.28302	1.19094	0.233829	3.57766e-19	1.30497e-17	NA	NA	NA	NA	NA	NA	chr15	35043232	35047166
cg08146323	ZNF835	0.172935	0.410631	2.37449	1.24761	0.237696	3.77762e-19	1.3708e-17	68.9177	36.6853	0.532306	-0.909673	0.100838	0.405463	chr19	57174019	57183151
cg02229775	CACNG4	0.151288	0.412969	2.7297	1.44874	0.261682	4.66745e-19	1.65826e-17	NA	NA	NA	NA	NA	NA	chr17	64961025	65029514
cg16334314	SNAP91	0.127268	0.425585	3.344	1.74158	0.298317	4.7417e-19	1.68037e-17	NA	NA	NA	NA	NA	NA	chr6	84262598	84419410
cg26162582	KCNA6	0.149765	0.403154	2.69191	1.42863	0.253389	5.35376e-19	1.88181e-17	NA	NA	NA	NA	NA	NA	chr12	4918341	4960277
cg13473356	PEX5L	0.167255	0.4206	2.51472	1.3304	0.253345	5.71045e-19	1.99654e-17	NA	NA	NA	NA	NA	NA	chr3	179512745	179754841
cg02409351	ALX1	0.190098	0.416154	2.18915	1.13037	0.226056	6.08241e-19	2.11842e-17	NA	NA	NA	NA	NA	NA	chr12	85673884	85695562
cg03817667	VSTM2A	0.129386	0.409892	3.16799	1.66357	0.280507	6.14173e-19	2.13805e-17	NA	NA	NA	NA	NA	NA	chr7	54610017	54638773
cg16697438	NPFFR1	0.169294	0.410477	2.42464	1.27777	0.241183	8.08753e-19	2.73915e-17	NA	NA	NA	NA	NA	NA	chr10	72014712	72043440
cg07963234	CRMP1	0.177013	0.463046	2.61589	1.3873	0.286033	9.97954e-19	3.30734e-17	1356.21	1183.44	0.872606	-0.196598	0.476539	0.80013	chr4	5749810	5894785
cg25763393	ZNF578	0.187144	0.414046	2.21245	1.14564	0.226902	1.15619e-18	3.76465e-17	NA	NA	NA	NA	NA	NA	chr19	52956828	53015407
cg10056132	C10ORF53	0.195908	0.420031	2.14402	1.10032	0.224122	1.48582e-18	4.74444e-17	NA	NA	NA	NA	NA	NA	chr10	50887696	50918307
cg15110403	ANKLE1	0.122739	0.406462	3.3116	1.72753	0.283723	1.52723e-18	4.86786e-17	NA	NA	NA	NA	NA	NA	chr19	17392453	17398455
cg00860808	GAD1	0.188634	0.426877	2.26299	1.17823	0.238243	1.73764e-18	5.46644e-17	105.869	321.148	3.03346	1.60096	0.002097	0.0379796	chr2	171669722	171717661
cg03957481	KLHDC7B	0.152954	0.411338	2.68929	1.42723	0.258384	1.96481e-18	6.08345e-17	95.3383	109.48	1.14834	0.199546	0.494331	0.811076	chr22	50986461	50989451
cg08328777	DUOX1	0.118163	0.4246	3.59333	1.84532	0.306437	1.98546e-18	6.13953e-17	NA	NA	NA	NA	NA	NA	chr15	45422130	45457774
cg13554207	LPAR3	0.185353	0.444231	2.39668	1.26103	0.258878	3.23922e-18	9.64623e-17	NA	NA	NA	NA	NA	NA	chr1	85277284	85358896
cg02394955	PPYR1	0.129111	0.423646	3.28125	1.71425	0.294535	4.13928e-18	1.20737e-16	NA	NA	NA	NA	NA	NA	chr10	47083533	47088320
cg22836229	EFCAB1	0.195248	0.426723	2.18554	1.12799	0.231475	4.19513e-18	1.22169e-16	NA	NA	NA	NA	NA	NA	chr8	49623347	49647870
cg04014105	SLC22A16	0.154359	0.401323	2.59993	1.37847	0.246964	5.89098e-18	1.66669e-16	NA	NA	NA	NA	NA	NA	chr6	110745889	110797844
cg13849378	RGS7	0.123092	0.436169	3.54346	1.82516	0.313078	5.94136e-18	1.68029e-16	113.837	103.607	0.910129	-0.135858	0.861923	0.965206	chr1	240931553	241520530
cg05863502	CACNA1B	0.191915	0.429262	2.23673	1.16139	0.237347	6.07561e-18	1.71491e-16	NA	NA	NA	NA	NA	NA	chr9	140772240	141019076
cg26332310	BARHL2	0.19181	0.402892	2.10047	1.07071	0.211082	6.45878e-18	1.81389e-16	NA	NA	NA	NA	NA	NA	chr1	91177158	91182794
cg26199241	TBX4	0.168647	0.407969	2.41907	1.27445	0.239322	6.93211e-18	1.9326e-16	NA	NA	NA	NA	NA	NA	chr17	59529764	59562471
cg04894619	PEX5L	0.193791	0.424538	2.1907	1.13139	0.230748	1.24248e-17	3.31967e-16	NA	NA	NA	NA	NA	NA	chr3	179512745	179754841
cg21449170	KLF14	0.16815	0.410415	2.44076	1.28733	0.242265	1.26756e-17	3.3842e-16	NA	NA	NA	NA	NA	NA	chr7	130417400	130418888
cg09341793	RP11-131H24.4	0.152418	0.430954	2.82744	1.4995	0.278536	1.33317e-17	3.54501e-16	NA	NA	NA	NA	NA	NA	chr14	94405900	94410475
cg14582763	ZNF578	0.191876	0.412292	2.14875	1.10349	0.220416	1.58473e-17	4.15299e-16	NA	NA	NA	NA	NA	NA	chr19	52956828	53015407
cg05293820	STXBP5L	0.133843	0.407046	3.04122	1.60465	0.273203	1.62916e-17	4.25405e-16	NA	NA	NA	NA	NA	NA	chr3	120626918	121143608
cg15060012	ZNF418	0.155817	0.402692	2.58439	1.36983	0.246875	1.82494e-17	4.71604e-16	152.745	81.3574	0.532635	-0.90878	0.0363093	0.239593	chr19	58433251	58446761
cg26397188	WIF1	0.178536	0.416615	2.33351	1.2225	0.238079	1.86318e-17	4.80288e-16	NA	NA	NA	NA	NA	NA	chr12	65444405	65515346
cg19295951	DUOX1	0.137745	0.424877	3.08452	1.62504	0.287132	1.88096e-17	4.84527e-16	NA	NA	NA	NA	NA	NA	chr15	45422130	45457774
cg10084644	STAG3	0.17468	0.401938	2.301	1.20226	0.227259	2.12333e-17	5.41889e-16	490.364	394.735	0.804985	-0.312967	0.293801	0.663397	chr7	99775185	99819111
cg16846653	ABCC9	0.189307	0.411892	2.17579	1.12154	0.222585	2.12382e-17	5.41889e-16	1470.44	1205.63	0.81991	-0.286463	0.0471597	0.273523	chr12	21950334	22094336
cg25316339	ANKRD34B	0.187327	0.417431	2.22836	1.15598	0.230104	2.42282e-17	6.11597e-16	NA	NA	NA	NA	NA	NA	chr5	79852573	79866307
cg21242918	VAX1	0.199856	0.454692	2.2751	1.18593	0.254836	2.90169e-17	7.24062e-16	NA	NA	NA	NA	NA	NA	chr10	118888031	118897812
cg25531700	MMP17	0.171137	0.447908	2.61724	1.38805	0.27677	3.05365e-17	7.5962e-16	NA	NA	NA	NA	NA	NA	chr12	132312937	132336328
cg11145160	CLDN11	0.188641	0.436354	2.31315	1.20986	0.247713	3.73194e-17	9.14547e-16	85.26	92.3229	1.08284	0.11482	1	1	chr3	170136652	170578169
cg14156405	RGS7	0.116163	0.467508	4.02457	2.00883	0.351344	5.82271e-17	1.38798e-15	113.837	103.607	0.910129	-0.135858	0.861923	0.965206	chr1	240931553	241520530
cg12628196	LRRC4	0.0944771	0.411031	4.35059	2.12121	0.316554	6.66126e-17	1.57236e-15	229.538	129.251	0.563093	-0.828555	0.0205743	0.170798	chr7	127667123	127672160
cg24152605	ZFP28	0.19715	0.540138	2.73973	1.45403	0.342988	9.7836e-17	2.24719e-15	291.752	179.756	0.616127	-0.698701	0.0650281	0.32544	chr19	57050316	57068169
cg15140703	STAG3	0.168484	0.411015	2.4395	1.28658	0.242532	1.04993e-16	2.40017e-15	490.364	394.735	0.804985	-0.312967	0.293801	0.663397	chr7	99775185	99819111
cg00674365	ZNF471	0.19398	0.540831	2.78807	1.47927	0.34685	1.52168e-16	3.39617e-15	328.104	200.762	0.611884	-0.70867	0.0724554	0.343543	chr19	57019211	57041590
cg17121747	MFSD7	0.115556	0.416785	3.60679	1.85072	0.301229	1.92471e-16	4.2229e-15	302.624	242.809	0.802346	-0.317704	0.286948	0.655185	chr4	675617	683230
cg12193731	ACVRL1	0.18266	0.415985	2.27737	1.18737	0.233324	3.53646e-16	7.44597e-15	3538.21	2341.15	0.661677	-0.595801	0.000275526	0.00826942	chr12	52300691	52317145
cg08575537	EPO	0.196824	0.4678	2.37675	1.24899	0.270976	4.42112e-16	9.16491e-15	319.679	666.985	2.08642	1.06103	0.0674658	0.33105	chr7	100318422	100321323
cg05436231	CD164L2	0.196412	0.422908	2.15317	1.10646	0.226496	4.87109e-16	1.00317e-14	NA	NA	NA	NA	NA	NA	chr1	27705665	27709870
cg22287064	MYO15B	0.170941	0.475323	2.78062	1.47541	0.304382	5.14564e-16	1.05671e-14	3717.3	4455.74	1.19865	0.261412	0.126088	0.453122	chr17	73584138	73622929
cg06829830	RASGRF2	0.153163	0.417985	2.72901	1.44838	0.264821	6.01733e-16	1.22257e-14	1315.07	933.454	0.709814	-0.494487	0.0176749	0.154426	chr5	80256490	80525975
cg06943420	MMP23B	0.169817	0.4266	2.51212	1.3289	0.256783	7.09118e-16	1.42162e-14	NA	NA	NA	NA	NA	NA	chr1	1567473	1570639
cg08258526	EFCAB1	0.191928	0.414046	2.1573	1.10923	0.222118	1.0804e-15	2.10547e-14	NA	NA	NA	NA	NA	NA	chr8	49623347	49647870
cg14882700	OTOP1	0.188346	0.425092	2.25697	1.17439	0.236746	2.56232e-15	4.73742e-14	NA	NA	NA	NA	NA	NA	chr4	4190529	4228616
cg26636193	DPYSL3	0.106797	0.419292	3.92605	1.97308	0.312495	3.17697e-15	5.79405e-14	3839.82	5629.28	1.46603	0.551913	0.00280527	0.0466044	chr5	146770373	146889619
cg10961604	CD164L2	0.194516	0.424369	2.18166	1.12543	0.229853	4.71755e-15	8.40087e-14	NA	NA	NA	NA	NA	NA	chr1	27705665	27709870
cg13947995	FES	0.16817	0.437708	2.60277	1.38005	0.269538	5.42112e-15	9.56219e-14	781.981	711.119	0.909382	-0.137042	0.584879	0.853751	chr15	91426924	91439006
cg10703826	TBX15	0.181431	0.4236	2.33477	1.22328	0.242169	7.65507e-15	1.32417e-13	178.016	346.209	1.94482	0.959638	0.00125454	0.0262444	chr1	119425668	119532179
cg25975621	ESRRG	0.191451	0.406323	2.12233	1.08565	0.214872	8.87548e-15	1.52077e-13	619.452	382.97	0.61824	-0.693761	0.0258382	0.195375	chr1	216676587	217311097
cg05983315	ZSCAN1	0.144092	0.422385	2.93136	1.55157	0.278293	1.0002e-14	1.70052e-13	NA	NA	NA	NA	NA	NA	chr19	58545399	58565999
cg05848863	TSPAN13	0.186569	0.4604	2.46772	1.30318	0.273831	3.28024e-14	5.21052e-13	1335.66	1653.28	1.2378	0.307773	0.19798	0.559293	chr7	16793159	16824161
cg22054362	ZFP28	0.16702	0.417508	2.49975	1.32179	0.250488	6.27054e-14	9.67232e-13	291.752	179.756	0.616127	-0.698701	0.0650281	0.32544	chr19	57050316	57068169
cg02280532	LY75	0.149242	0.460385	3.08482	1.62519	0.311143	1.06141e-13	1.59086e-12	464.92	537.54	1.1562	0.209391	0.63567	0.875267	chr2	160628361	160761260
cg02621287	PRB2	0.199046	0.450462	2.26311	1.1783	0.251416	2.92384e-13	4.16044e-12	NA	NA	NA	NA	NA	NA	chr12	11544475	11653975
cg14819504	LY75	0.197268	0.416708	2.11239	1.07888	0.21944	4.39566e-11	4.94174e-10	464.92	537.54	1.1562	0.209391	0.63567	0.875267	chr2	160628361	160761260
cg25537993	ZSCAN1	0.190549	0.437215	2.2945	1.19818	0.246666	1.07222e-10	1.15906e-09	NA	NA	NA	NA	NA	NA	chr19	58545399	58565999
Supplementary Table 1: List of 369 probe sets defining the C-CIMP (CpG island methylator phenotype) in ccRCCs, including mean beta-values of those in C-CIMP (cluster 3) versus no-CIMP (cluster 2). Expression values as well as fold-changes of gene expression of those genes are also reported.
